# Supplementary material
Source: ML conference proceedings conference paper supplement (https://openreview.net/forum?id=yADrJyaBJl)
Supplement: supplementary_material [file SvrpBenchmark.pdf › SvrpBenchmark.pdf]

## 1 A Open Infrastructure

2 To ensure reproducibility, extensibility, and accessibility, we release all components of the benchmark  
3 openly on GitHub and Hugging Face. This includes the dataset, instance generator, evaluation engine,  
4 and baseline implementations. Evaluation instances can be used out of the box, while the modular  
5 codebase allows users to integrate new solvers and adapt evaluation scripts.

6 A public leaderboard on huggingface<sup>1</sup> serves as the central hub for documentation, instance down-  
7 loads, and leaderboard submissions. Submissions are validated automatically and ranked by total  
8 cost, feasibility, and runtime. All data and code are versioned, containerized (Docker-supported), and  
9 designed to support future extensions such as new routing scenarios or solver classes.

10 We welcome community contributions, including new solvers, datasets, and improvements to docu-  
11 mentation or evaluation tools. By sharing the infrastructure broadly, we aim to foster collaboration  
12 and accelerate progress in realistic stochastic routing research.

### 13 A.1 Reproducibility Requirements

14 To maintain transparency and enable fair comparison, submissions intended for leaderboard inclusion  
15 or academic publication must satisfy several criteria. Solvers must be evaluated on the official  
16 benchmark test set, with all hyperparameters, configuration details, and seed values fully documented.  
17 Additionally, we encourage open-source releases or detailed methodological descriptions to ensure  
18 algorithm reproducibility. Runtime should be measured using the official script or a clearly defined  
19 procedure, consistent across all experiments.

20 These guidelines help uphold reproducibility standards advocated in combinatorial optimization liter-  
21 ature [2, 1] and promote meaningful scientific comparisons under controlled, yet realistic, conditions.

## 22 B Baseline Models

23 **Ant Colony Optimization (ACO).** Routes are constructed by sampling next locations based on  
24 pheromone intensity and heuristic proximity. The pheromone matrix is updated as:

$$\tau_{ij} \leftarrow (1 - \rho)\tau_{ij} + \sum_{k=1}^m \Delta\tau_{ij}^{(k)}, \quad \Delta\tau_{ij}^{(k)} = \begin{cases} \frac{Q}{L^{(k)}}, & \text{if } (i, j) \in \text{tour}^{(k)} \\ 0, & \text{otherwise,} \end{cases} \quad (1)$$

25 where  $\rho = 0.5$ ,  $m = 50$  ants,  $\alpha = 1$ , and  $\beta = 2$ .

26 **Tabu Search.** Candidate solutions are evaluated using a penalized cost function:

$$f(S) = \text{Cost}(S) + \lambda \cdot \text{Penalty}(S), \quad (2)$$

27 where  $\lambda$  is adaptively tuned based on violation severity.

28 **Learning-Based Methods.** The Attention Model is trained to minimize the expected cost:

$$\mathcal{L}(\theta) = \mathbb{E}_{X \sim \mathcal{D}} [\mathbb{E}_{\pi_\theta(a|X)} [L(a|X)]] . \quad (3)$$

29 POMO uses multiple rollout agents initialized with distinct permutations. Its gradient signal is  
30 computed as:

$$\nabla_\theta J(\theta) = \frac{1}{M} \sum_{m=1}^M \sum_t \nabla_\theta \log \pi_\theta(a_t^m | s_t^m) \cdot (R^m - b), \quad (4)$$

31 where  $M$  is the number of rollouts and  $b$  is a learned baseline for variance reduction.

## 32 C Detailed Solver Performance Breakdowns

33 Tables 1,2,3,4,5,6 present a comprehensive performance breakdown of various solvers across multi-  
34 ple configurations for Capacitated VRP (CVRP) and Time Window VRP (TWVRP). Each solver,

---

<sup>1</sup><https://huggingface.co/spaces/ahmedheak1/SVRP-leaderboard>

35 NN+2opt, Tabu Search, ACO, OR-Tools, and RL-based methods (Attention, POMO), is evaluated  
 36 under different settings including depot configurations (single depot, multi depot, depots equal to  
 37 cities), problem sizes (ranging from 10 to 1000 customers), and feasibility constraints. Metrics  
 38 include total cost, CVR (constraint violation rate), feasibility, runtime, and time window violations.  
 39 Traditional heuristic solvers (NN+2opt, Tabu, ACO) generally yield competitive costs with increasing  
 40 runtimes as problem size grows, while OR-Tools offers consistent feasibility but with significantly  
 41 higher runtimes. Reinforcement learning solvers (Attention, POMO) demonstrate exceptionally fast  
 42 runtimes (in milliseconds), achieving full feasibility across all tested instances, although their cost can  
 43 vary notably, especially for large-scale problems where some cost inflation is observed (e.g. POMO  
 44 on 1000-node CVRP). These results highlight trade-offs between solution quality, computational  
 45 efficiency, and scalability across solver paradigms.

Table 1: NN+2opt - Detailed Performance Breakdown.

| Configuration                           | Size | Cost     | CVR  | Feas  | Runtime | TW Violations |
|-----------------------------------------|------|----------|------|-------|---------|---------------|
| single depot single vehicule sumDemands | 10   | 2290.7   | 0.0  | 1.000 | 0.0     | 0.00          |
| multi depot                             | 10   | 2371.8   | 0.0  | 1.000 | 2.0     | 0.00          |
| single depot single vehicule sumDemands | 20   | 3736.5   | 0.0  | 1.000 | 0.3     | 0.00          |
| multi depot                             | 20   | 3662.9   | 0.0  | 1.000 | 3.2     | 0.00          |
| single depot single vehicule sumDemands | 50   | 4840.4   | 0.0  | 1.000 | 10.5    | 0.00          |
| multi depot                             | 50   | 5626.1   | 0.0  | 1.000 | 14.1    | 0.00          |
| single depot single vehicule sumDemands | 100  | 6841.4   | 0.0  | 1.000 | 31.8    | 0.00          |
| multi depot                             | 100  | 7868.2   | 0.0  | 1.000 | 31.3    | 0.00          |
| single depot single vehicule sumDemands | 200  | 11268.2  | 0.0  | 1.000 | 125.2   | 0.00          |
| multi depot                             | 200  | 11479.2  | 0.0  | 1.000 | 135.5   | 0.00          |
| single depot single vehicule sumDemands | 500  | 16390.0  | 0.0  | 1.000 | 829.5   | 0.00          |
| multi depot                             | 500  | 17551.0  | 0.0  | 1.000 | 826.3   | 0.00          |
| single depot single vehicule sumDemands | 1000 | 25844.3  | 0.0  | 1.000 | 3545.9  | 0.00          |
| multi depot                             | 1000 | 25817.4  | 0.0  | 1.000 | 3493.3  | 0.00          |
| depots equal city                       | 10   | 4564.6   | 3.3  | 0.967 | 2.0     | 0.00          |
| single depot                            | 10   | 4359.0   | 3.3  | 0.967 | 2.0     | 0.00          |
| depots equal city                       | 20   | 8192.2   | 0.0  | 1.000 | 5.7     | 0.00          |
| single depot                            | 20   | 8347.0   | 0.0  | 1.000 | 5.0     | 0.00          |
| depots equal city                       | 50   | 13666.8  | 0.0  | 1.000 | 14.9    | 0.00          |
| single depot                            | 50   | 13882.4  | 0.7  | 0.993 | 11.7    | 0.00          |
| depots equal city                       | 100  | 38704.2  | 6.0  | 0.940 | 52.2    | 0.00          |
| single depot                            | 100  | 30389.4  | 1.0  | 0.990 | 37.8    | 0.00          |
| depots equal city                       | 200  | 89937.2  | 10.1 | 0.899 | 145.2   | 0.00          |
| single depot                            | 200  | 55400.9  | 1.0  | 0.990 | 167.8   | 0.00          |
| depots equal city                       | 500  | 175711.7 | 7.7  | 0.923 | 1318.5  | 0.00          |
| single depot                            | 500  | 118279.0 | 2.2  | 0.978 | 929.7   | 0.00          |
| depots equal city                       | 1000 | 244956.8 | 6.1  | 0.939 | 3865.2  | 0.00          |
| single depot                            | 1000 | 187829.7 | 2.7  | 0.973 | 3911.5  | 0.00          |

Table 2: Tabu Search - Detailed Performance Breakdown.

| Configuration                           | Size | Cost     | CVR  | Feas  | Runtime | TW Violations |
|-----------------------------------------|------|----------|------|-------|---------|---------------|
| single depot single vehicle sumDemands  | 10   | 2297.2   | 0.0  | 1.000 | 19.4    | 0.00          |
| multi depot                             | 10   | 2373.8   | 0.0  | 1.000 | 13.3    | 0.00          |
| single depot single vehicule sumDemands | 20   | 3776.7   | 0.0  | 1.000 | 47.6    | 0.00          |
| multi depot                             | 20   | 3656.4   | 0.0  | 1.000 | 33.8    | 0.00          |
| single depot single vehicule sumDemands | 50   | 4897.0   | 0.0  | 1.000 | 79.8    | 0.00          |
| multi depot                             | 50   | 5749.3   | 0.0  | 1.000 | 102.9   | 0.00          |
| single depot single vehicule sumDemands | 100  | 6981.9   | 0.0  | 1.000 | 170.0   | 0.00          |
| multi depot                             | 100  | 8058.6   | 0.0  | 1.000 | 169.2   | 0.00          |
| single depot single vehicule sumDemands | 200  | 11417.8  | 0.0  | 1.000 | 373.9   | 0.00          |
| multi depot                             | 200  | 11602.8  | 0.0  | 1.000 | 314.2   | 0.00          |
| single depot single vehicule sumDemands | 500  | 16554.8  | 0.0  | 1.000 | 1270.4  | 0.00          |
| multi depot                             | 500  | 17676.2  | 0.0  | 1.000 | 1445.1  | 0.00          |
| single depot single vehicule sumDemands | 1000 | 25995.4  | 0.0  | 1.000 | 4647.9  | 0.00          |
| multi depot                             | 1000 | 25879.7  | 0.0  | 1.000 | 4544.5  | 0.00          |
| depots equal city                       | 10   | 3966.1   | 3.3  | 0.667 | 185.9   | 0.00          |
| single depot                            | 10   | 4067.6   | 3.3  | 0.667 | 193.6   | 0.00          |
| depots equal city                       | 20   | 8156.1   | 0.0  | 1.000 | 479.8   | 0.00          |
| single depot                            | 20   | 7661.3   | 0.0  | 1.000 | 489.9   | 0.00          |
| depots equal city                       | 50   | 13918.7  | 0.0  | 1.000 | 719.3   | 0.00          |
| single depot                            | 50   | 14269.3  | 0.7  | 0.667 | 654.4   | 0.00          |
| depots equal city                       | 100  | 39031.2  | 6.0  | 0.000 | 2013.6  | 0.00          |
| single depot                            | 100  | 30820.4  | 1.0  | 0.333 | 1998.3  | 0.00          |
| depots equal city                       | 200  | 90028.5  | 10.1 | 0.000 | 2662.6  | 0.00          |
| single depot                            | 200  | 55596.2  | 1.0  | 0.000 | 3014.1  | 0.00          |
| depots equal city                       | 500  | 176001.3 | 8.1  | 0.000 | 13851.1 | 0.00          |
| single depot                            | 500  | 118726.0 | 2.2  | 0.000 | 11822.7 | 0.00          |
| depots equal city                       | 1000 | 244953.3 | 6.2  | 0.000 | 50402.1 | 0.00          |
| single depot                            | 1000 | 187945.6 | 2.7  | 0.000 | 42673.2 | 0.00          |

Table 3: ACO - Detailed Performance Breakdown.

| Configuration                           | Size | Cost     | CVR  | Feas  | Runtime | TW Violations |
|-----------------------------------------|------|----------|------|-------|---------|---------------|
| single depot single vehicule sumDemands | 10   | 2183.6   | 0.0  | 1.000 | 14.3    | 0.00          |
| multi depot                             | 10   | 2325.4   | 0.0  | 1.000 | 11.9    | 0.00          |
| single depot single vehicule sumDemands | 20   | 3725.9   | 0.0  | 1.000 | 34.6    | 0.00          |
| multi depot                             | 20   | 3644.2   | 0.0  | 1.000 | 31.4    | 0.00          |
| single depot single vehicule sumDemands | 50   | 4840.5   | 0.0  | 1.000 | 165.2   | 0.00          |
| multi depot                             | 50   | 5626.2   | 0.0  | 1.000 | 179.5   | 0.00          |
| single depot single vehicule sumDemands | 100  | 6840.4   | 0.0  | 1.000 | 698.1   | 0.00          |
| multi depot                             | 100  | 7868.4   | 0.0  | 1.000 | 678.2   | 0.00          |
| single depot single vehicule sumDemands | 200  | 11264.3  | 0.0  | 1.000 | 2295.7  | 0.00          |
| multi depot                             | 200  | 11473.0  | 0.0  | 1.000 | 2380.3  | 0.00          |
| single depot single vehicule sumDemands | 500  | 16389.2  | 0.0  | 1.000 | 15573.5 | 0.00          |
| multi depot                             | 500  | 17551.6  | 0.0  | 1.000 | 16468.6 | 0.00          |
| single depot single vehicule sumDemands | 1000 | 25840.7  | 0.0  | 1.000 | 58364.4 | 0.00          |
| multi depot                             | 1000 | 25815.8  | 0.0  | 1.000 | 59341.2 | 0.00          |
| depots equal city                       | 10   | 3931.6   | 3.3  | 0.667 | 9.4     | 0.00          |
| single depot                            | 10   | 3819.2   | 3.3  | 0.667 | 9.6     | 0.00          |
| depots equal city                       | 20   | 7714.2   | 0.0  | 1.000 | 34.2    | 0.00          |
| single depot                            | 20   | 7749.4   | 0.0  | 1.000 | 34.1    | 0.00          |
| depots equal city                       | 50   | 13535.4  | 0.0  | 1.000 | 166.9   | 0.00          |
| single depot                            | 50   | 13872.4  | 0.7  | 0.667 | 143.6   | 0.00          |
| depots equal city                       | 100  | 37800.2  | 6.0  | 0.000 | 629.4   | 0.00          |
| single depot                            | 100  | 30389.5  | 1.0  | 0.333 | 679.0   | 0.00          |
| depots equal city                       | 200  | 89937.2  | 10.1 | 0.000 | 2556.8  | 0.00          |
| single depot                            | 200  | 55401.8  | 1.0  | 0.000 | 2327.0  | 0.00          |
| depots equal city                       | 500  | 175711.1 | 7.7  | 0.000 | 15299.3 | 0.00          |
| single depot                            | 500  | 118280.2 | 2.2  | 0.000 | 14781.5 | 0.00          |
| depots equal city                       | 1000 | 244999.0 | 6.1  | 0.000 | 70932.6 | 0.00          |
| single depot                            | 1000 | 187332.2 | 2.8  | 0.000 | 54846.8 | 0.00          |

Table 4: OR-Tools - Detailed Performance Breakdown.

| Configuration                           | Size | Cost     | CVR  | Feas  | Runtime | TW Violations |
|-----------------------------------------|------|----------|------|-------|---------|---------------|
| single depot single vehicule sumDemands | 10   | 2049.2   | 0.0  | 1.000 | 1037.9  | 0.00          |
| multi depot                             | 10   | 2167.6   | 0.0  | 1.000 | 1003.3  | 0.00          |
| single depot single vehicule sumDemands | 20   | 3238.9   | 0.0  | 1.000 | 999.5   | 0.00          |
| multi depot                             | 20   | 3142.2   | 0.0  | 1.000 | 1002.6  | 0.00          |
| single depot single vehicule sumDemands | 50   | 3773.4   | 0.0  | 1.000 | 1015.9  | 0.00          |
| multi depot                             | 50   | 4714.2   | 0.0  | 1.000 | 1015.9  | 0.00          |
| single depot single vehicule sumDemands | 100  | 6283.5   | 0.0  | 1.000 | 1046.5  | 0.00          |
| multi depot                             | 100  | 6250.4   | 0.0  | 1.000 | 1048.8  | 0.00          |
| single depot single vehicule sumDemands | 200  | 9198.8   | 0.0  | 1.000 | 1174.7  | 0.00          |
| multi depot                             | 200  | 8956.2   | 0.0  | 1.000 | 1185.4  | 0.00          |
| single depot single vehicule sumDemands | 500  | 15677.5  | 0.0  | 1.000 | 2129.5  | 0.00          |
| multi depot                             | 500  | 15883.2  | 0.0  | 1.000 | 2085.2  | 0.00          |
| single depot single vehicule sumDemands | 1000 | 25844.3  | 0.0  | 1.000 | 8412.4  | 0.00          |
| multi depot                             | 1000 | 25816.3  | 0.0  | 1.000 | 9434.5  | 0.00          |
| depots equal city                       | 10   | 4564.7   | 3.3  | 0.967 | 12.6    | 0.00          |
| single depot                            | 10   | 4359.0   | 3.3  | 0.967 | 3.6     | 0.00          |
| depots equal city                       | 20   | 8192.3   | 0.0  | 1.000 | 8.2     | 0.00          |
| single depot                            | 20   | 8346.9   | 0.0  | 1.000 | 7.2     | 0.00          |
| depots equal city                       | 50   | 13666.7  | 0.0  | 1.000 | 30.3    | 0.00          |
| single depot                            | 50   | 13882.3  | 0.7  | 0.993 | 27.7    | 0.00          |
| depots equal city                       | 100  | 38704.1  | 6.0  | 0.940 | 108.6   | 0.00          |
| single depot                            | 100  | 30389.3  | 1.0  | 0.990 | 87.8    | 0.00          |
| depots equal city                       | 200  | 89937.5  | 10.1 | 0.899 | 345.3   | 0.00          |
| single depot                            | 200  | 55401.8  | 1.0  | 0.990 | 329.8   | 0.00          |
| depots equal city                       | 500  | 175711.4 | 7.7  | 0.923 | 2010.0  | 0.00          |
| single depot                            | 500  | 118279.4 | 2.2  | 0.978 | 2020.5  | 0.00          |
| depots equal city                       | 1000 | 244998.0 | 6.1  | 0.939 | 8273.1  | 0.00          |
| single depot                            | 1000 | 187830.1 | 2.7  | 0.973 | 8464.4  | 0.00          |

Table 5: RL Algorithms – Detailed Performance on CVRP (runtimes in ms).

| Solver    | Configuration                           | Size | Cost      | CVR  | Feas  | Runtime (ms) | TW Violations |
|-----------|-----------------------------------------|------|-----------|------|-------|--------------|---------------|
| Attention | single depot single vehicule sumDemands | 10   | 2364.12   | 0.00 | 1.000 | 0.365        | 0.00          |
| POMO      | single depot single vehicule sumDemands | 10   | 2312.68   | 0.00 | 1.000 | 0.282        | 0.00          |
| Attention | single depot single vehicule sumDemands | 20   | 3222.68   | 0.00 | 1.000 | 0.269        | 0.00          |
| POMO      | single depot single vehicule sumDemands | 20   | 3341.56   | 0.00 | 1.000 | 0.279        | 0.00          |
| Attention | single depot single vehicule sumDemands | 50   | 5803.63   | 0.00 | 1.000 | 0.304        | 0.00          |
| POMO      | single depot single vehicule sumDemands | 50   | 5920.19   | 0.00 | 1.000 | 0.287        | 0.00          |
| Attention | single depot single vehicule sumDemands | 100  | 8553.26   | 0.00 | 1.000 | 0.319        | 0.00          |
| POMO      | single depot single vehicule sumDemands | 100  | 16983.50  | 0.00 | 1.000 | 0.319        | 0.00          |
| Attention | single depot single vehicule sumDemands | 200  | 13228.84  | 0.00 | 1.000 | 0.353        | 0.00          |
| POMO      | single depot single vehicule sumDemands | 200  | 12726.96  | 0.00 | 1.000 | 0.360        | 0.00          |
| Attention | single depot single vehicule sumDemands | 500  | 22496.94  | 0.00 | 1.000 | 0.463        | 0.00          |
| POMO      | single depot single vehicule sumDemands | 500  | 88789.44  | 0.00 | 1.000 | 0.506        | 0.00          |
| Attention | single depot single vehicule sumDemands | 1000 | 37430.47  | 0.00 | 1.000 | 0.649        | 0.00          |
| POMO      | single depot single vehicule sumDemands | 1000 | 184656.10 | 0.00 | 1.000 | 0.689        | 0.00          |

Table 6: RL Algorithms – Detailed Performance on TWVRP (runtimes in ms).

| Solver    | Configuration | Size | Cost       | CVR  | Feas  | Runtime (ms) | TW Violations |
|-----------|---------------|------|------------|------|-------|--------------|---------------|
| Attention | single depot  | 10   | 3 940.38   | 0.00 | 1.000 | 0.916        | 0.00          |
| POMO      | single depot  | 10   | 3 854.6    | 0.00 | 1.000 | 0.707        | 0.00          |
| Attention | single depot  | 20   | 6 504.73   | 0.00 | 1.000 | 1.780        | 0.00          |
| POMO      | single depot  | 20   | 6 744.7    | 0.00 | 1.000 | 1.841        | 0.00          |
| Attention | single depot  | 50   | 29 132.94  | 0.00 | 1.000 | 0.731        | 0.00          |
| POMO      | single depot  | 50   | 29 718.0   | 0.00 | 1.000 | 0.689        | 0.00          |
| Attention | single depot  | 100  | 57 778.84  | 0.00 | 1.000 | 0.864        | 0.00          |
| POMO      | single depot  | 100  | 114 726.7  | 0.00 | 1.000 | 0.864        | 0.00          |
| Attention | single depot  | 200  | 113 742.27 | 0.00 | 1.000 | 0.868        | 0.00          |
| POMO      | single depot  | 200  | 109 427.1  | 0.00 | 1.000 | 0.886        | 0.00          |
| Attention | single depot  | 500  | 271 201.60 | 0.00 | 1.000 | 1.412        | 0.00          |
| POMO      | single depot  | 500  | 438 502.6  | 0.00 | 1.000 | 1.412        | 0.00          |
| Attention | single depot  | 1000 | 531 470.88 | 0.00 | 1.000 | 1.638        | 0.00          |
| POMO      | single depot  | 1000 | 611 307.8  | 0.00 | 1.000 | 1.672        | 0.00          |

## 46 C.1 Qualitative Results

47 As shown in figures 1, 2, 3, 4, 5, 6, 7, 8, 9, and 10, we qualitatively observe that for CVRP instances  
 48 with a small number of customers, both Attention and POMO models, as well as classical methods  
 49 (ACO, NN2OPT, and OR-Tools), generate highly structured and near-optimal routes. As the number  
 50 of customers increases, route complexity grows, making it harder for models to preserve efficiency  
 51 and structure. For TWVRP, the models' priority shifts toward satisfying delivery time windows, often  
 52 at the expense of distance optimization. This results in routes that appear less spatially coherent but

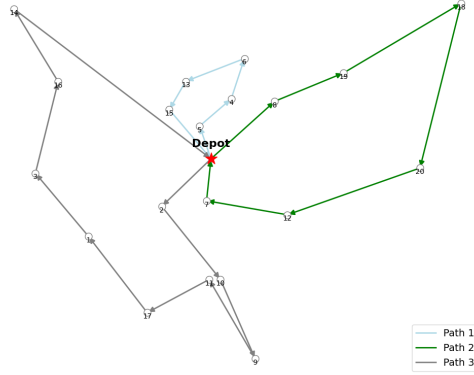

Figure 1: CVRP 20 customers – Attention Model

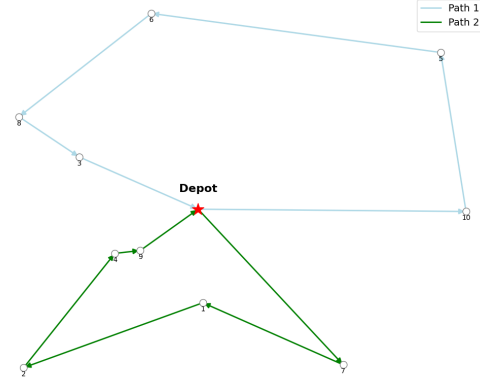

Figure 2: CVRP 10 customers – POMO

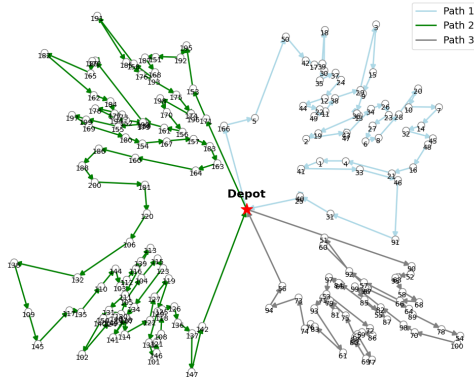

Figure 3: CVRP 200 customers – Attention Model

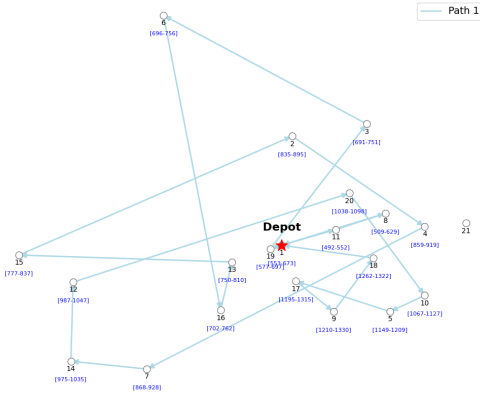

Figure 4: TWVRP 20 customers – Attention Model

53

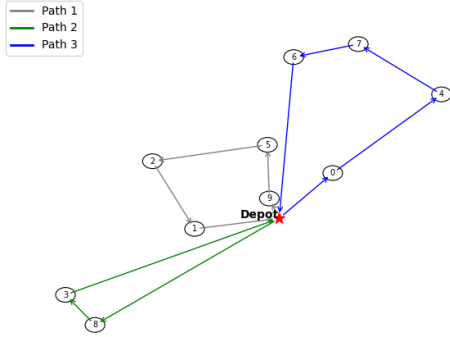

Figure 5: CVRP 10 customers – ACO

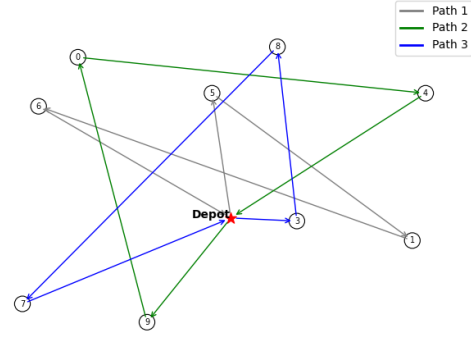

Figure 6: TWVRP 10 customers – ACO

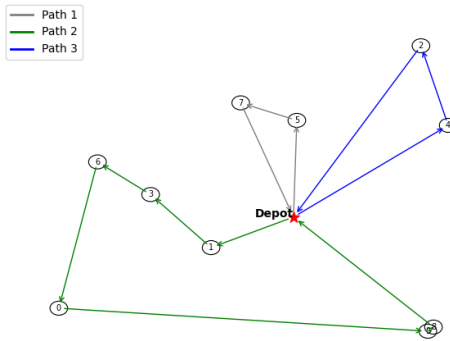

Figure 7: CVRP 10 customers – NN2OPT

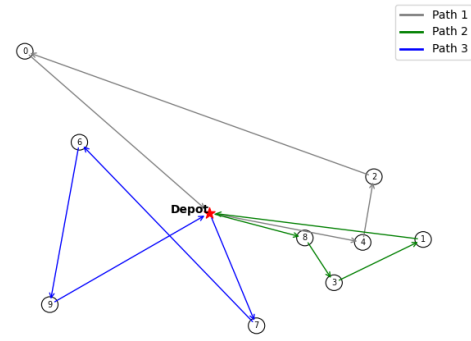

Figure 8: TWVRP 10 customers – NN2OPT

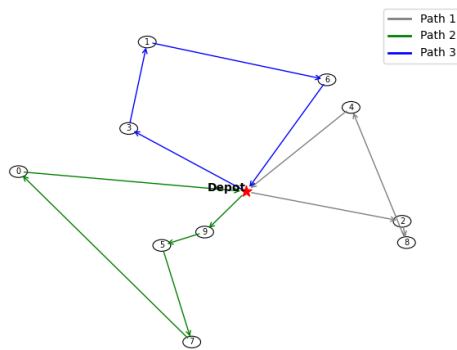

Figure 9: CVRP 10 customers – OR-Tools

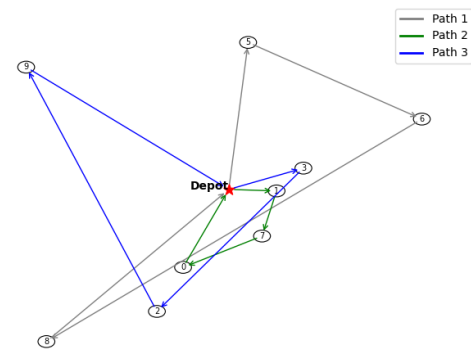

Figure 10: TWVRP 10 customers – OR-Tools

## 54 D Reinforcement Learning

### 55 D.1 Problem Formulation

56 We model both the Capacitated Vehicle Routing Problem (CVRP) and Vehicle Routing Problem  
57 with Time Windows (VRPTW) as a Markov Decision Process (MDP)  $\mathcal{M} = (\mathcal{S}, \mathcal{A}, P, r, \gamma)$ , where  
58 each state  $s_t \in \mathcal{S}$  encodes the vehicle’s current position, remaining capacity, visited set (and only  
59 for VRPTW the current time and per-customer time windows  $[e_i, \ell_i]$ ). Actions  $a_t \in \mathcal{A}(s_t)$  select the  
60 next customer, and transitions  $P(s_{t+1} | s_t, a_t)$  deterministically update the tour while, in VRPTW,  
61 adding stochastic delays.

62 The reward is  $r(s_t, a_t) = -d_{i,j} - \tau [t_{\text{arrive}} > \ell_i]$  when visiting customer  $j$ , with  $d_{i,j}$  the Euclidean  
63 distance and  $\tau$  a large penalty for time-window violations, and zero upon return to the depot. We  
64 follow a constructive, autoregressive decoding: at each step we append one customer until all are  
65 visited.

### 66 D.2 Policy

67 We adopt the encoder–decoder with multi-head attention of Kool [3]. Given embedded node features  
68  $\mathbf{x}_i \in \mathbb{R}^d$ , each of the  $L$  encoder layers applies multi-head self-attention. At step  $t$ , with context  
69 embedding  $\mathbf{h}_t$ , we score each remaining node  $j$  by  $u_{t,j} = \mathbf{v}^\top \tanh(W_1 \mathbf{h}_t + W_2 \mathbf{x}_j)$  and define  
70  $\pi_\theta(a_t = j | s_t) = \exp(u_{t,j}) / \sum_{k \notin \mathcal{V}_t} \exp(u_{t,k})$ .

71 We optimize the policy by maximizing the expected return  $J(\theta) = \mathbb{E}_{\tau \sim \pi_\theta}[R(\tau)]$  using two con-  
72 structive, autoregressive policy-gradient methods. A constructive policy builds a complete solution  
73 by sequentially selecting one customer at a time until the tour is finished, while an autoregressive  
74 policy conditions each action on the history of previous choices, enabling the network to capture  
75 dependencies across steps.

76 We first apply REINFORCE [5], which updates parameters via  $\nabla_\theta J(\theta) = \mathbb{E}[\sum_t \nabla_\theta \log \pi_\theta(a_t |$   
77  $s_t) (R(\tau) - b(s_t))]$ , where  $b(s_t)$  is a rollout baseline obtained by greedy decoding; then POMO [4]  
78 samples  $K$  different start nodes per instance, computes returns  $R_k$  and a shared baseline  $\bar{R} =$   
79  $\frac{1}{K} \sum_k R_k$ , and applies  $\nabla_\theta J(\theta) = \frac{1}{K} \sum_{k=1}^K \nabla_\theta \log \pi_\theta(\tau_k) (R_k - \bar{R})$ . REINFORCE offers simplicity  
80 and unbiased gradients, while POMO’s shared baseline exploits VRP permutation symmetry for  
81 variance reduction; together they provide a strong comparison between a classical Monte Carlo  
82 approach and a state-of-the-art, variance-reduced VRP-specific algorithm.

### 83 D.3 Training Details

84 All models were implemented in the RL4CO framework and trained end-to-end with Adam at a  
85 learning rate of  $10^{-4}$ . For CVRP with REINFORCE we used a batch size of 512 and generated  
86 100 000 synthetic instances on the fly; for VRPTW with POMO we used batch size 64 and 1 000 000  
87 instances. Validation employed greedy decoding under nominal travel-time conditions. VRPTW  
88 environments included log-normal delays calibrated to traffic data, Gaussian time-of-day kernels, and  
89 Poisson accident events, with infeasible actions heavily penalized to enforce time windows.

### 90 D.4 Evaluation on SVRPBench

91 After training, we converted each of the 500+ SVRPBench instances into the RL4CO environment  
92 format and ran the trained policies in greedy mode, selecting at each step  $a_t = \arg \max_j \pi_\theta(a_t =$   
93  $j | s_t)$ . To assess robustness, we then simulated each resulting tour under multiple sampled delay  
94 realizations and reported average tour length and feasibility rates. Despite domain shift, attention-  
95 based RL policies maintained high feasibility and near-optimal costs across all problem sizes.

96 **References**

- 97 [1] Yossiri Adulyasak and Patrick Jaillet. Models and algorithms for stochastic and robust vehicle  
98 routing with deadlines. *Transportation Science*, 50(2):608–626, 2016.
- 99 [2] K. Chepuri and T. Homem-de Mello. Solving the vehicle routing problem with stochastic  
100 demands using the cross-entropy method. *Annals of Operations Research*, 134(1):153–181,  
101 2005.
- 102 [3] Wouter Kool, Herke van Hoof, and Max Welling. Attention, learn to solve routing problems!  
103 *International Conference on Learning Representations (ICLR)*, 2019.
- 104 [4] Yeong-Dae Kwon, Jinho Choo, Byoungjip Kim, Iljoo Yoon, Youngjune Gwon, and Seungjai  
105 Min. Pomo: Policy optimization with multiple optima for reinforcement learning. *Advances in*  
106 *Neural Information Processing Systems*, 33:21188–21198, 2020.
- 107 [5] Ronald J Williams. Simple statistical gradient-following algorithms for connectionist reinforce-  
108 ment learning. *Machine learning*, 8(3):229–256, 1992.
